# Supplementary material for: Cu-MOFs@AuPtNPs nanozyme-based immunosorbent assay for colorimetric detection of alpha-fetoprotein
Source: Royal Society of Chemistry journal article supplement (doi:10.1039/d4ay01410c), 2024-01-01
Supplement: d4ay01410c1.pdf [file d4ay01410c1.pdf]

## Supporting information

### **Cu-MOFs@AuPtNPs nanozyme-based immunosorbent assay for colorimetric detection of alpha-fetoprotein.**

Sitian Tang<sup>a</sup>, Juan Cai<sup>b</sup>, Kai Zhou<sup>c</sup>, Zhu Mei<sup>a</sup>, Dongmei Huang<sup>a</sup>, Ling  
Liu<sup>a</sup>, Lunyu Yang<sup>a</sup>, Dan Yin<sup>a\*</sup>, Liyi Hu<sup>a\*</sup>

<sup>a</sup> Department of Clinical Laboratory Medicine, The People's Hospital of Chongqing Liangjiang New Area, No. 199 Ren Xing Road, Yubei, Chongqing, 401121, PR China

<sup>b</sup> Department of Clinical Laboratory Medicine, Southwest Hospital, Army Medical University, Chongqing, 400038, PR China

<sup>c</sup> Department of Spine Surgery, The People's Hospital of Chongqing Liangjiang New Area, No. 199 Ren Xing Road, Yubei, Chongqing, 401121, PR China

\*Correspondence author:

Liyi Hu, Department of Clinical Laboratory Medicine, The People's Hospital of Chongqing Liangjiang New Area, No. 199 Ren Xing Road, Yubei, Chongqing 401121, PR China

E-mail address: [hlyhhy@163.com](mailto:hlyhhy@163.com)

Tel.: +86 23 61213810

Fax: +86 23 61213809

Dan Yin, Department of Clinical Laboratory Medicine, The People's  
Hospital of Chongqing Liangjiang New Area, No. 199 Ren Xing Road,  
Yubei, Chongqing 401121, PR China

E-mail address: [Dianayin530@hotmail.com](mailto:Dianayin530@hotmail.com)

Tel.: +86 23 61366584

Fax: +86 23 61366583

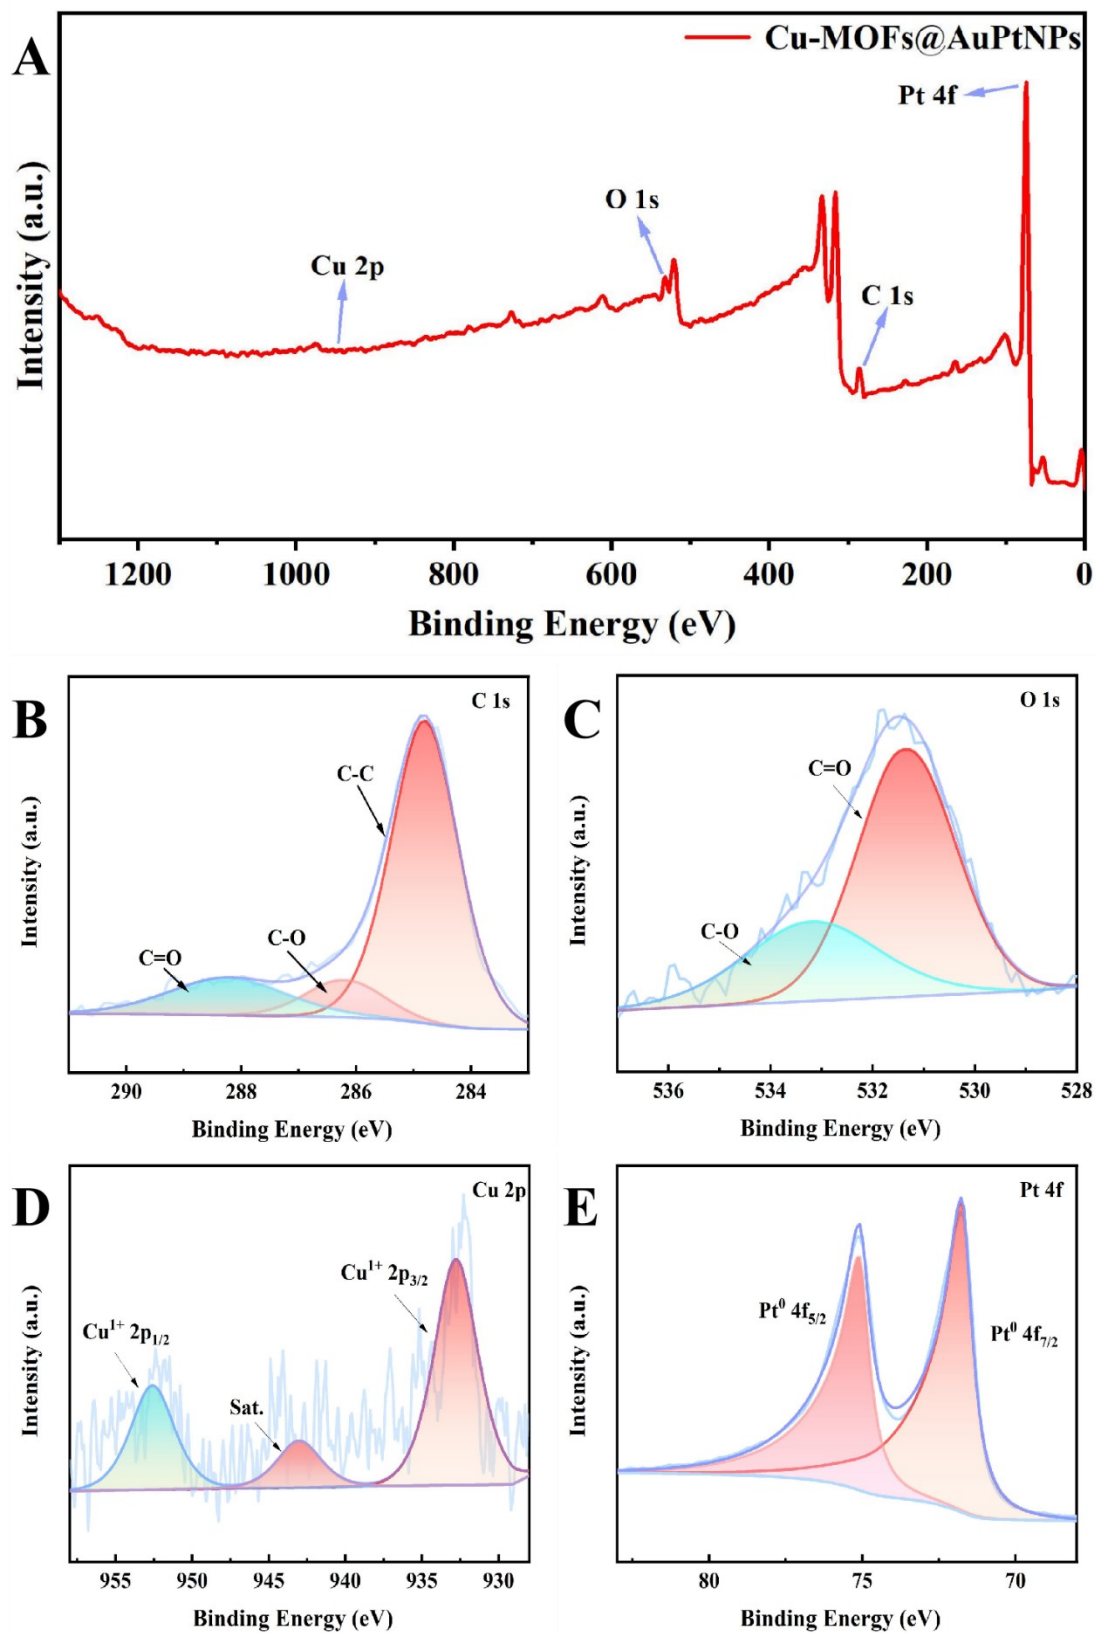

*Fig. S1 XPS results for (A) Cu-MOFs@AuPtNPs-Ab, (B) C 1s, (C) O 1s, (D) Cu 2p, and (E) Pt 4f*

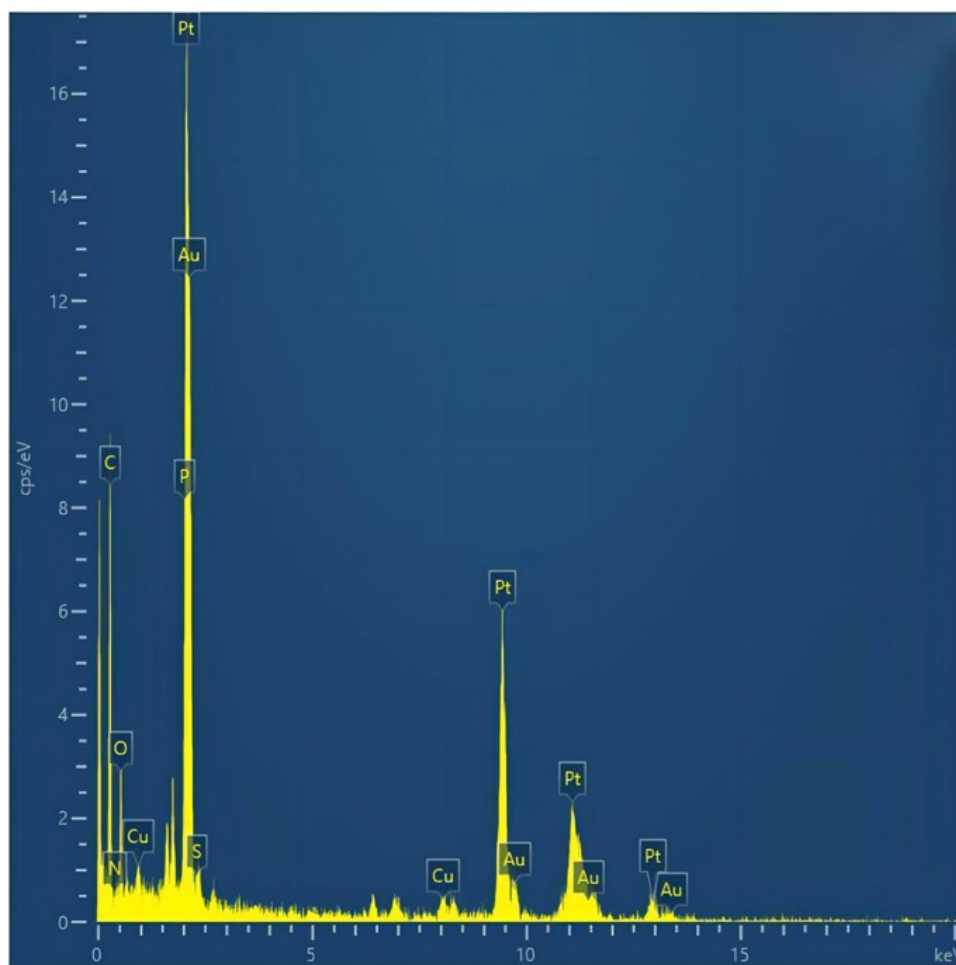

*Fig. S2 EDS pattern of Cu-MOFs@AuPtNPs-Ab*

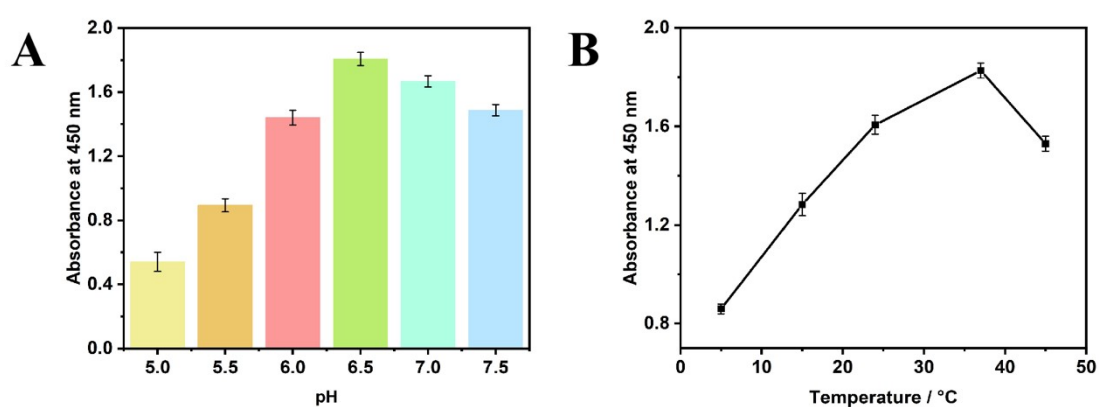

*Fig. S3 Effect of the (A) The pH values of the reaction solution, (B) the reaction temperature of the AFP and signal probes*

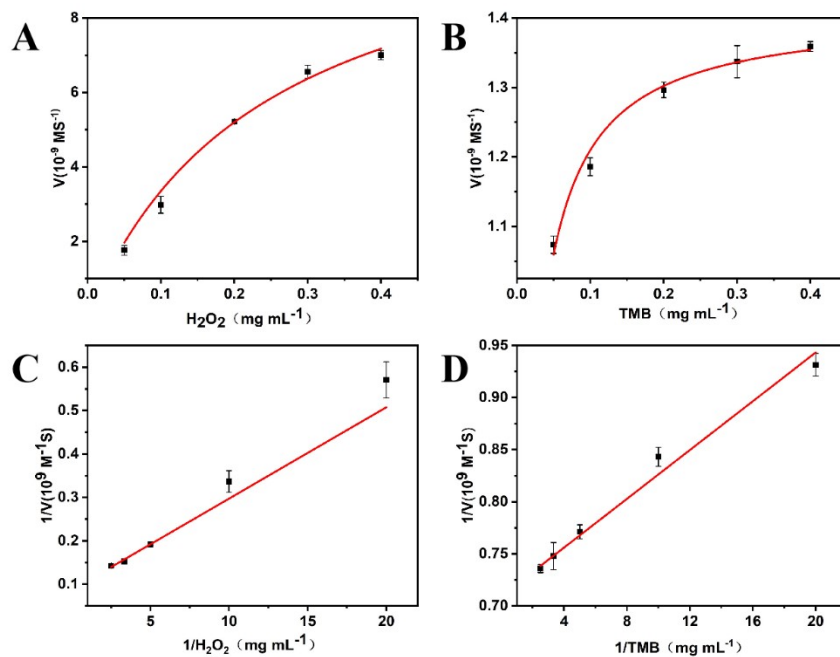

*Fig. S4. Determination of the steady-state kinetics of Cu-MOFs@AuPtNPs. (A) The concentration of  $\text{H}_2\text{O}_2$  varied, while keeping the concentration of TMB constant ( $0.2 \text{ mg mL}^{-1}$ ). (B) The concentration of TMB varied, while keeping the concentration of  $\text{H}_2\text{O}_2$  constant ( $0.3 \text{ mg mL}^{-1}$ ). (C) and (D) were the double reciprocal plots corresponding to (A) and (B) respectively.*

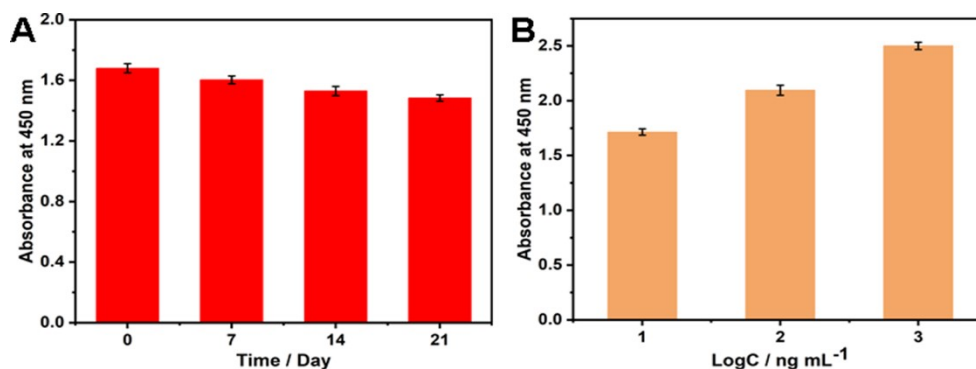

*Fig. S5 (A) Stability of the MeLISA after stored at  $4 \text{ }^\circ\text{C}$  for 7, 14, and 21 days. ( $10 \text{ ng mL}^{-1}$  of AFP) Error bars = RSD ( $n = 5$ ). (B) Reproducibility of the MeLISA: the absorbance at 450 nm of 1, 10, and 100  $\text{ng mL}^{-1}$  were recorded. Error bars = RSD ( $n = 5$ ).*

**Table S1.** Comparison of steady-state kinetic parameters ( $K_m$  and  $V_{max}$ ) of Cu-MOFs@AuPtNPs and HRP.

| Catalyst        | $K_m/mM$ |       | $V_{max}/M\ s^{-1}$   |                       |
|-----------------|----------|-------|-----------------------|-----------------------|
|                 | $H_2O_2$ | TMB   | $H_2O_2$              | TMB                   |
| Cu-MOFs@AuPtNPs | 0.246    | 0.017 | $1.16 \times 10^{-8}$ | $1.41 \times 10^{-8}$ |
| HRP             | 3.7      | 0.434 | $8.71 \times 10^{-8}$ | $1.0 \times 10^{-7}$  |

**Table S2.** Comparison of the detection limit with other AFP detection systems

| Detection method                     | Linear range<br>( $ng\ mL^{-1}$ ) | Detection limit<br>( $pg\ mL^{-1}$ ) | Reference    |
|--------------------------------------|-----------------------------------|--------------------------------------|--------------|
| Fluorescence                         | 0.5– $10^4$                       | 170                                  | 1            |
| photoelectrochemical<br>immunosensor | 0.1-300                           | 82                                   | 2            |
| plasmonic<br>ELISA                   | 2 - 200                           | 230                                  | 3            |
| potentiometric<br>immunoassays       | 0.01 - 100                        | 7.9                                  | 4            |
| MeLISA                               | 0.001-1000                        | 0.86                                 | Present work |

References:

1. Y. Liu, Y. Chen, Y. Zhang, Q. Zhong, X. Zhu and Q. Wu, *Analyst*, 2022, **147**, 3186-3192.
2. X. Zhong, M. Zhang, L. Guo, Y. Xie, R. Luo, W. Chen, F. Cheng and L. Wang, *Biosens Bioelectron*, 2021, **189**, 113389.
3. Z. Xuan, M. Li, P. Rong, W. Wang, Y. Li and D. Liu, *Nanoscale*, 2016, **8**, 17271-17277.
4. Z. Zhang, F. Cai, J. Chen, S. Luo, Y. Lin and T. Zheng, *Analyst*, 2022, **147**, 4752-4760.

**Table S3** AFP detected by the proposed MeLISA in the real blood (indicated by relative standard deviation, RSD, n=5).

| Spiked<br>AFP<br>ng mL <sup>-1</sup> | Detected<br>AFP<br>ng mL <sup>-1</sup> | Recovery<br>(%) | Spiked<br>AFP<br>ng mL <sup>-1</sup> | Detected<br>AFP<br>ng mL <sup>-1</sup> | Recovery<br>(%) | Spiked<br>AFP<br>ng mL <sup>-1</sup> | Detected<br>AFP<br>ng mL <sup>-1</sup> | Recovery<br>(%) |
|--------------------------------------|----------------------------------------|-----------------|--------------------------------------|----------------------------------------|-----------------|--------------------------------------|----------------------------------------|-----------------|
| 0.1                                  | 0.0985                                 | 98.5            | 1                                    | 1.018                                  | 101.8           | 10                                   | 9.44                                   | 94.4            |
| 0.1                                  | 0.107                                  | 107.0           | 1                                    | 1.054                                  | 105.4           | 10                                   | 10.35                                  | 103.5           |
| 0.1                                  | 0.104                                  | 104.0           | 1                                    | 0.965                                  | 96.5            | 10                                   | 10.84                                  | 108.4           |
| 0.1                                  | 0.957                                  | 95.7            | 1                                    | 0.950                                  | 95.0            | 10                                   | 9.86                                   | 98.6            |
| 0.1                                  | 0.101                                  | 101.0           | 1                                    | 0.940                                  | 94.0            | 10                                   | 10.58                                  | 105.8           |
|                                      | RSD%                                   | 4.39            |                                      | RSD%                                   | 4.94            |                                      | RSD%                                   | 5.51            |
